# Supplementary material
Source: Springer Nature journal article supplement (https://www.springermedizin.de/resource/supplementary/13058_2011_2938_MOESM6_ESM.pdf/9702934)

**A**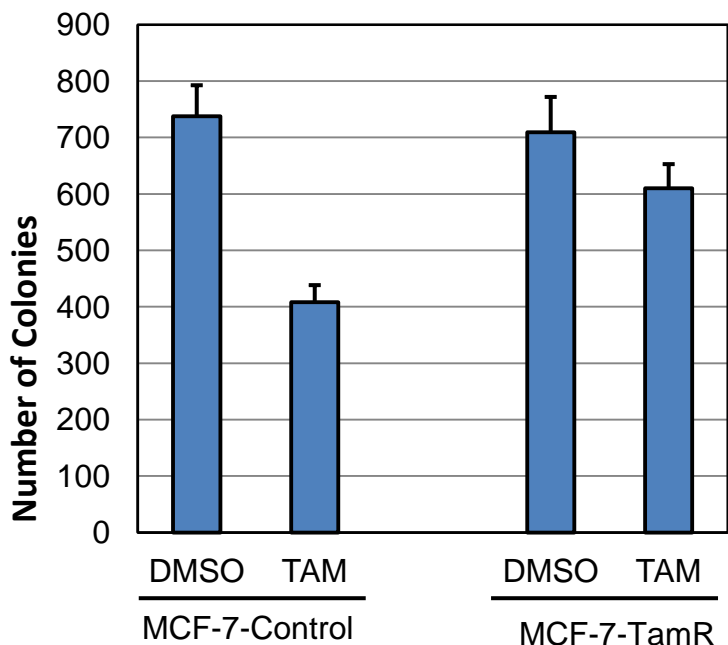**B****MCF-7-control**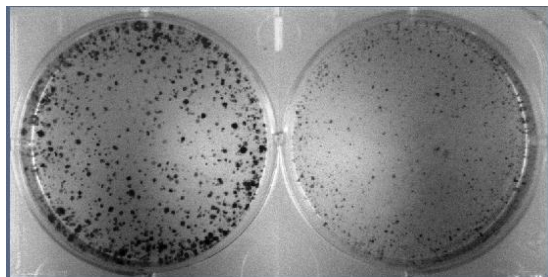**DMSO****TAM****MCF-7-TamR**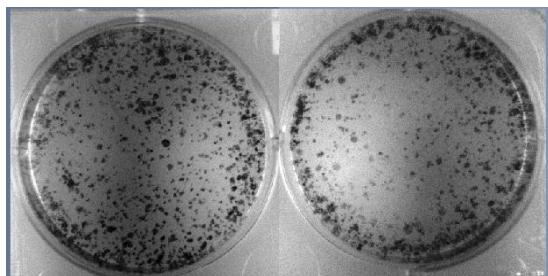

Supplement: MOESM6 [file 9702934]
